# Supplementary material for: Ancient Fennoscandian genomes reveal origin and spread of Siberian ancestry in Europe
Source: PubMed Central journal article supplement (PMC6258758; doi:10.1038/s41467-018-07483-5), 2018-11-27
Supplement: 41467_2018_7483_MOESM3_ESM.pdf [file 41467_2018_7483_MOESM3_ESM.pdf]

The legends of the Supplementary Data files are:

**Supplementary Data 1.** Information on comparative dataset used for this study.

**Supplementary Data 2.** Phenotypic SNP analysis. The associated gene, chromosome, position, rs tag and observed alleles are shown. For each studied individual, the number of reads supporting each allele is shown as a pair  $x/y$  where  $x$  denotes the number of reads supporting allele 1, and  $y$  the number of reads supporting allele 2.

**Supplementary Data 3.**  $f_3$ (Test; Siberian source, European source). the  $f_3$  with the most negative Z Score is highlighted in bold for each populations, where applicable.

**Supplementary Data 4.** qpAdm models. Models with p-values  $p \geq 0.05$ ,  $0.05 > p \geq 0.01$  and  $0.01 > p$  are highlighted in green, yellow and red respectively. Individuals from this study and populations containing them are shown in bold.

**Supplementary Data 5.**  $f_4$  (Finnish, Test; X, Mbuti) for multiple worldwide populations X. Z Scores highlighted by significance bin. Red:  $Z > 3$ , yellow:  $3 \geq Z > 2$ , gray:  $2 \geq Z \geq -2$ , green:  $-2 > Z \geq -3$  and blue:  $Z < -3$ .

**Supplementary Data 6.**  $f_4$  (Saami (SGDP), Test; X, Mbuti) for multiple worldwide populations X. Z Scores highlighted by significance bin. Red:  $Z > 3$ , yellow:  $3 \geq Z > 2$ , gray:  $2 \geq Z \geq -2$ , green:  $-2 > Z \geq -3$  and blue:  $Z < -3$ .

Yours sincerely, on behalf of all authors,  
Stephan Schiffels
